# Supplementary material for: The phenoxyl group-modulated interplay of cation–π and σ-type interactions in the alkali metal series
Source: Royal Society of Chemistry journal article supplement (doi:10.1039/d0cp03707a), 2020-01-01
Supplement: d0cp03707a1.pdf [file d0cp03707a1.pdf]

## SUPPLEMENTARY INFORMATION

### The Phenoxy Group-Modulated Interplay of Cation– $\pi$ and $\sigma$ -type Interactions in the Alkali Metal Series

Giacomo Prampolini,<sup>a,\*</sup>, Marco D'Ischia,<sup>b</sup> and Alessandro Ferretti,<sup>a,\*</sup>

<sup>a</sup>*Istituto di Chimica dei Composti OrganoMetallici (ICCOM-CNR),  
Area della Ricerca, via G. Moruzzi 1, I-56124 Pisa, Italy*

<sup>b</sup>*Dipartimento di Scienze Chimiche, Università di Napoli Federico II,  
I-80126 Napoli, Italy*

October 29, 2020

# Contents

|          |                                                                      |           |
|----------|----------------------------------------------------------------------|-----------|
| <b>1</b> | <b>1D curves</b>                                                     | <b>3</b>  |
| <b>2</b> | <b>Torsional energy profiles</b>                                     | <b>10</b> |
| <b>3</b> | <b>Interaction energy landscapes: <math>\delta</math> dependence</b> | <b>11</b> |

# 1 1D curves

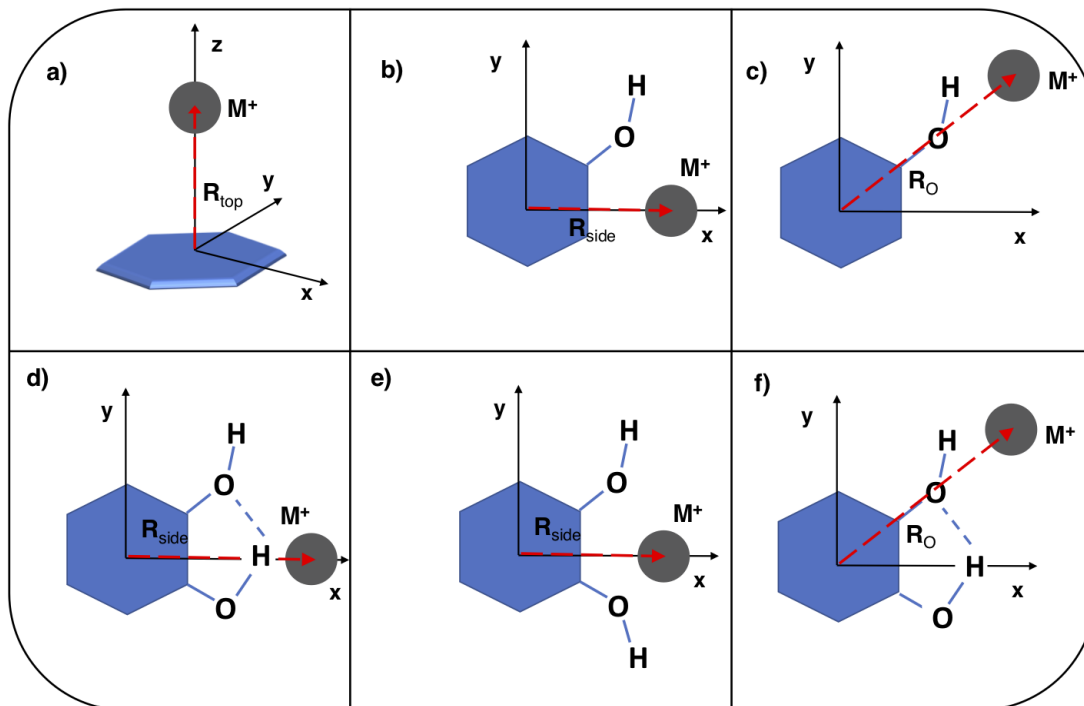

Figure S1:  $R$  displacement vector (red dashed arrows) of the  $M^+$  metal ion with respect to the considered aromatic ring in different geometrical arrangements: a)  $R_{top}$ , along the ( $z$ ) direction perpendicular to the aromatic ring plane ( $xy$ ) of either benzene, phenol or catechol; b)  $R_{side}$ , along the ( $x$ ) direction within the  $xy$  plane and bisecting the  $C=C$  bond of the Carbon bearing the oxygen in phenol; c)  $R_O$ , along the vector connecting the ring center with the Oxygen in phenol; d)  $R_{side}$ , along the ( $x$ ) direction within the  $xy$  plane and bisecting the  $C=C$  bond between the Carbon bearing the oxygen in catechol, with in the  $H$ -bonded ( $\delta=180^\circ$ ) conformation; e) same as d) but in the  $\delta=0^\circ$  conformation, without the internal HB; f) c)  $R_O$ , along the vector connecting the ring center with one of the Oxygens in catechol;

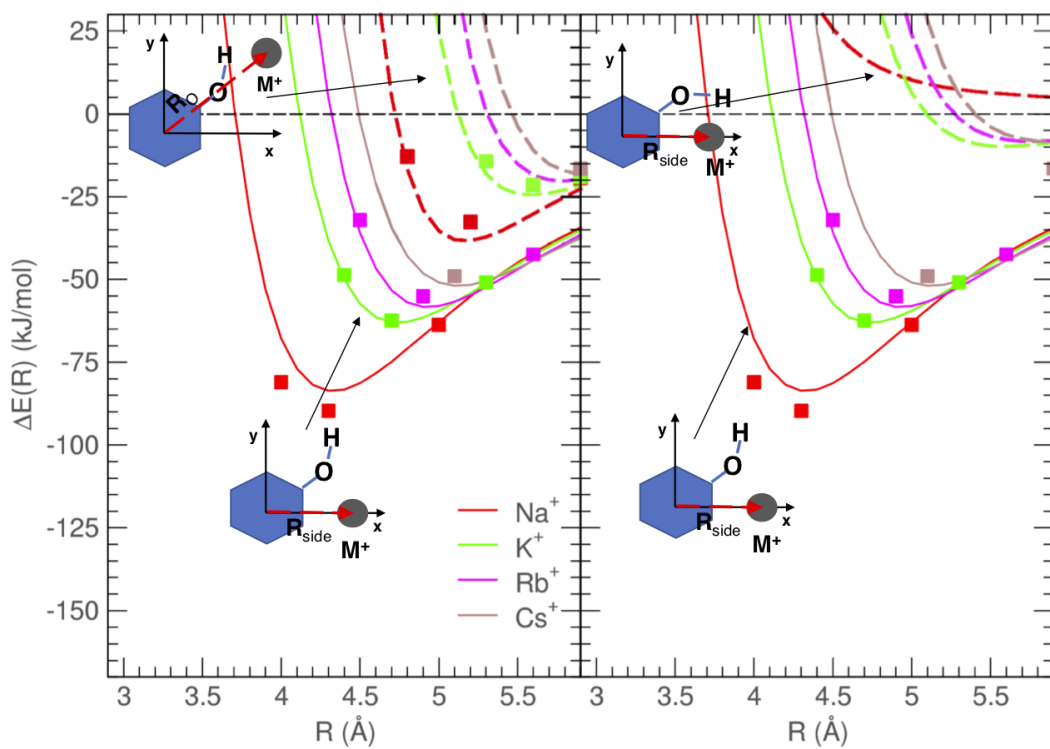

Figure S2: CCSD(T)/def2-TZVPPD (squares) and MP2<sup>mod</sup> (lines) interaction energy profiles ( $\Delta E(R)$ ) between Na<sup>+</sup> (red), K<sup>+</sup> (green), Rb<sup>+</sup> (magenta) and Cs<sup>+</sup> (brown) cations and phenol. Left panel: metal ion approaching along  $R_{side}$  (solid lines) or  $R_O$  (dashed lines). Right panel: metal ion approaching along  $R_{side}$  with phenol in either the  $\delta=180^\circ$  (solid lines) or  $\delta=0^\circ$  (dashed lines) conformation.

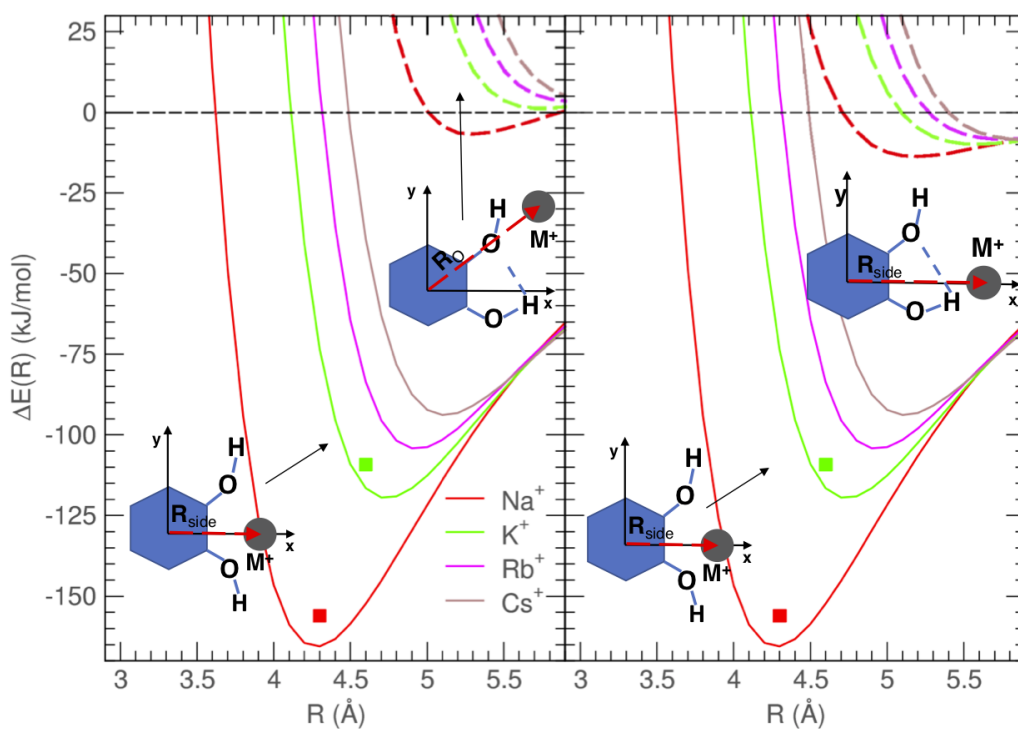

Figure S3: CCSD(T)/def2-TZVPPD (squares) and MP2<sup>mod</sup> (lines) interaction energy profiles ( $\Delta E(R)$ ) between Na<sup>+</sup> (red), K<sup>+</sup> (green), Rb<sup>+</sup> (magenta) and Cs<sup>+</sup> (brown) cations and catechol. Left panel: metal ion approaching along  $R_{side}$  (solid lines) or  $R_O$  (dashed lines). Right panel: metal ion approaching along  $R_{side}$  with with catechol in either the  $\delta=180^\circ$  (solid lines) or  $\delta=0^\circ$  (dashed lines) conformation.

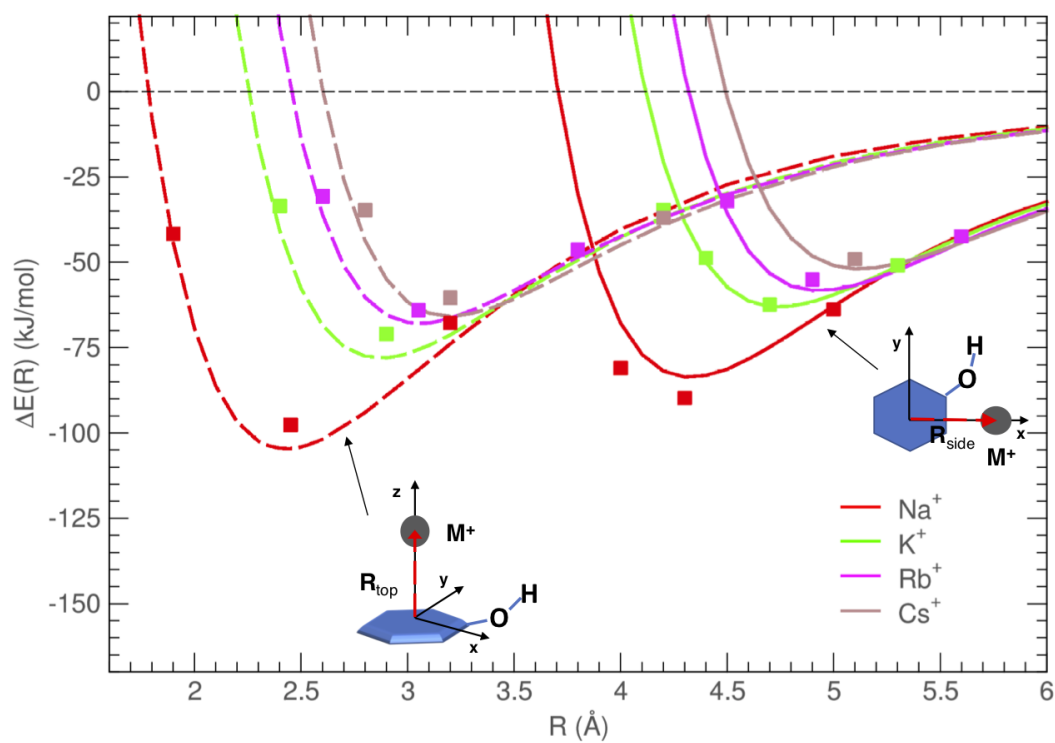

Figure S4: CCSD(T)/def2-TZVPPD (squares) and  $\text{MP2}^{mod}$  (lines) interaction energy profiles ( $\Delta E(R)$ ) between  $\text{Na}^+$  (red),  $\text{K}^+$  (green),  $\text{Rb}^+$  (magenta) and  $\text{Cs}^+$  (brown) cations and phenol. On the left side, as shown in the inset, metal ion approaching along  $R_{top}$  (dashed lines), whereas on the right the cation is displaced along  $R_{side}$  (solid lines).

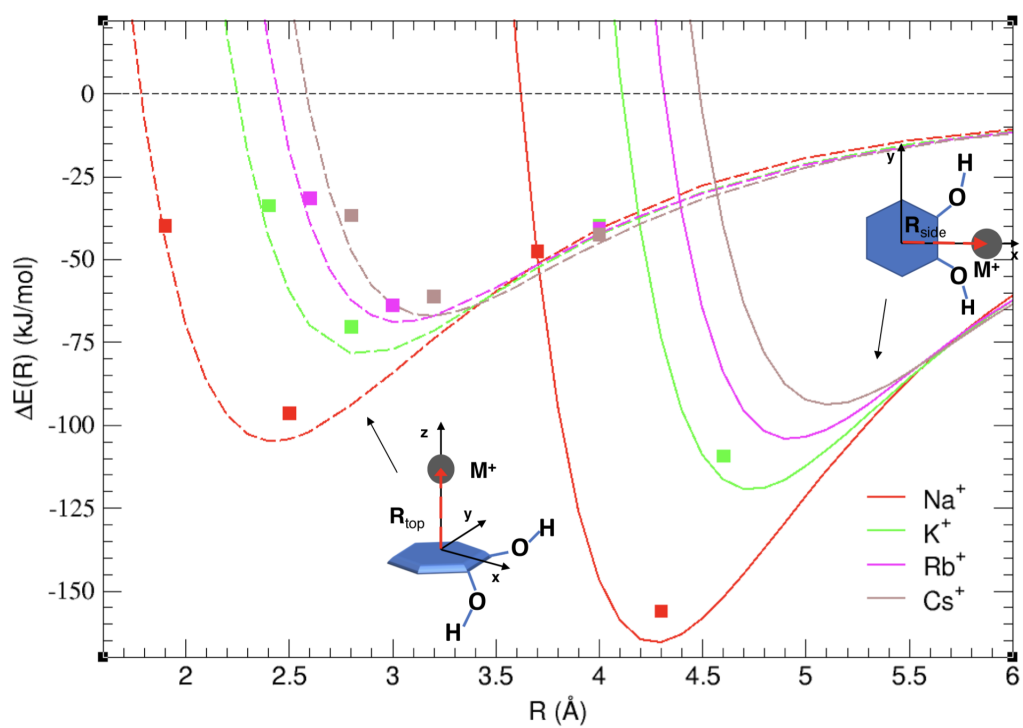

Figure S5: CCSD(T)/def2-TZVPPD (squares) and MP2<sup>mod</sup> (lines) interaction energy profiles ( $\Delta E(R)$ ) between  $\text{Na}^+$  (red),  $\text{K}^+$  (green),  $\text{Rb}^+$  (magenta) and  $\text{Cs}^+$  (brown) cations and catechol. On the left side, as shown in the inset, metal ion approaching along  $R_{\text{top}}$  (dashed lines), whereas on the right the cation is displaced along  $R_{\text{side}}$  (solid lines).

| M <sup>+</sup>  | Interaction | R (Å) | R <sub>O-M<sup>+</sup></sub> (Å) | ΔE (kJ/mol) |
|-----------------|-------------|-------|----------------------------------|-------------|
| Na <sup>+</sup> | cation-π    | 1.90  | 3.35                             | -44.1       |
| Na <sup>+</sup> | cation-π    | 2.45  | 3.69                             | -104.6      |
| Na <sup>+</sup> | cation-π    | 3.20  | 4.22                             | -73.9       |
| Na <sup>+</sup> | σ-type      | 4.00  | 2.07                             | -67.9       |
| Na <sup>+</sup> | σ-type      | 4.30  | 2.30                             | -83.6       |
| Na <sup>+</sup> | σ-type      | 5.00  | 2.90                             | -62.9       |
| K <sup>+</sup>  | cation-π    | 2.40  | 3.65                             | -40.8       |
| K <sup>+</sup>  | cation-π    | 2.90  | 4.00                             | -76.0       |
| K <sup>+</sup>  | cation-π    | 4.20  | 5.03                             | -37.0       |
| K <sup>+</sup>  | σ-type      | 4.40  | 2.39                             | -50.1       |
| K <sup>+</sup>  | σ-type      | 4.70  | 2.64                             | -61.0       |
| K <sup>+</sup>  | σ-type      | 5.30  | 3.17                             | -51.2       |
| Rb <sup>+</sup> | cation-π    | 2.60  | 3.79                             | -36.2       |
| Rb <sup>+</sup> | cation-π    | 3.05  | 4.11                             | -67.9       |
| Rb <sup>+</sup> | cation-π    | 3.80  | 4.70                             | -48.5       |
| Rb <sup>+</sup> | σ-type      | 4.50  | 2.47                             | -35.8       |
| Rb <sup>+</sup> | σ-type      | 4.90  | 2.82                             | -58.2       |
| Rb <sup>+</sup> | σ-type      | 5.60  | 3.45                             | -44.2       |
| Cs <sup>+</sup> | cation-π    | 2.80  | 3.93                             | -36.2       |
| Cs <sup>+</sup> | cation-π    | 3.20  | 4.23                             | -67.9       |
| Cs <sup>+</sup> | cation-π    | 4.20  | 5.03                             | -48.5       |
| Cs <sup>+</sup> | σ-type      | 4.70  | 2.64                             | -34.4       |
| Cs <sup>+</sup> | σ-type      | 5.10  | 2.99                             | -58.3       |
| Cs <sup>+</sup> | σ-type      | 5.80  | 3.64                             | -39.7       |

Table A: Inter-molecular distance (R) between the metal ion and the ring center, distance between the metal ion and the neighbouring oxygen atoms (R<sub>O-M<sup>+</sup></sub>) and MP2<sup>mod</sup> interaction energy (ΔE) computed for phenol⋯M<sup>+</sup> complexes in cation-π or σ-type selected arrangements.



| $M^+$  | Interaction    | R (Å) | $R_{O-M^+}$ (Å) | $\Delta E$ (kJ/mol) |
|--------|----------------|-------|-----------------|---------------------|
| $Na^+$ | cation- $\pi$  | 2.50  | 3.73            | -104.3              |
| $Na^+$ | $\sigma$ -type | 4.30  | 2.26            | -165.6              |
| $K^+$  | cation- $\pi$  | 2.80  | 3.94            | -78.4               |
| $K^+$  | $\sigma$ -type | 4.60  | 2.51            | -116.5              |

**Table B:** Inter-molecular distance (R) between the metal ion and the ring center, distance between the metal ion and the neighbouring oxygen atoms ( $R_{O-M^+}$ ) and MP2<sup>mod</sup> interaction energy ( $\Delta E$ ) computed for catechol... $M^+$  complexes in selected cation- $\pi$  or  $\sigma$ -type arrangements.

## 2 Torsional energy profiles

For phenol and catechol molecules, a relaxed internal energy scan was performed as a function of the  $\delta$  dihedral shown in Figure S1, by optimizing all degrees of freedom at MP2<sup>mod</sup> level, but the scanned torsional angle. The resulting curves are collected in Figure S6, together with a pictorial representation of the effect of the -OH rotation on the intramolecular HB.

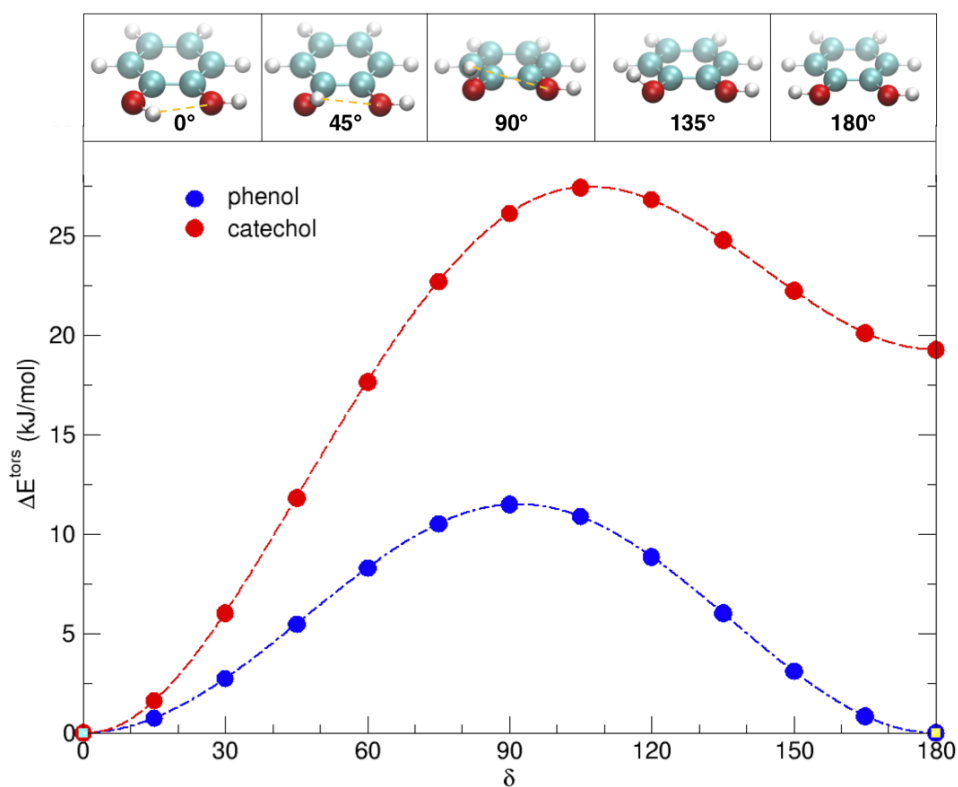

Figure S6: MP2<sup>mod</sup> relaxed torsional energy ( $\Delta E^{\text{tors}}$ ) scan as a function of the  $\delta$  dihedral around the C-OH bond in phenol (blue line) and catechol (red line). The effect of  $\delta$  rotation on the intramolecular HB is shown in the top inset.

### 3 Interaction energy landscapes: $\delta$ dependence

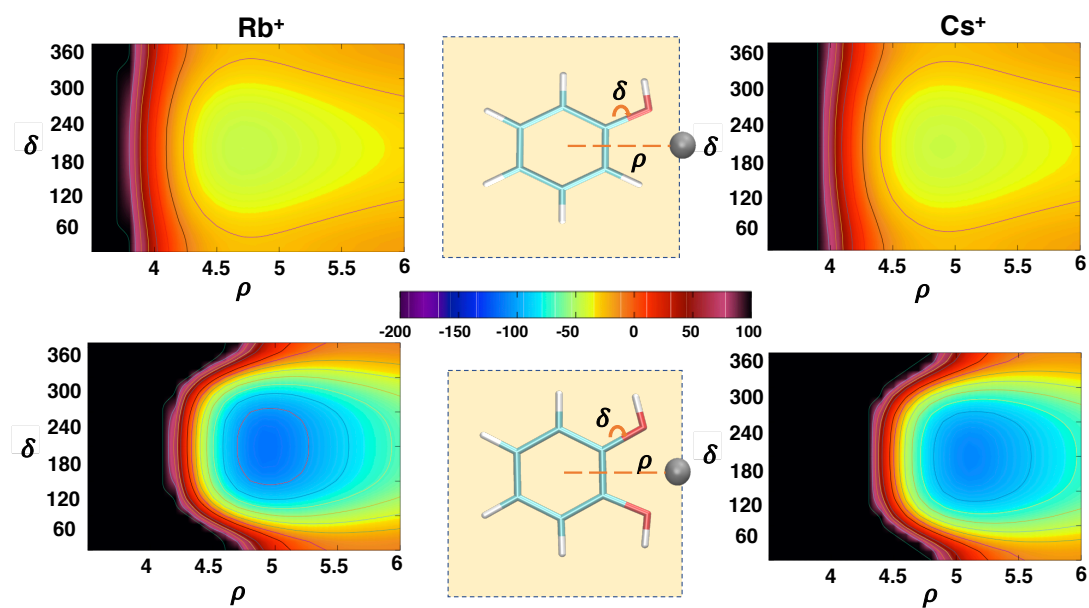

Figure S7: 2D interaction energy plots  $\Delta E(\rho, \delta)$  computed at  $\text{MP2}^{\text{mod}}$  level between phenol (top) or catechol (bottom) and  $\text{Rb}^+$  (left) or  $\text{Cs}^+$  (right) cations. The sampled PES region is shown in the insets together with the investigated dihedral. In the color palette, interaction energy is reported in kJ/mol.

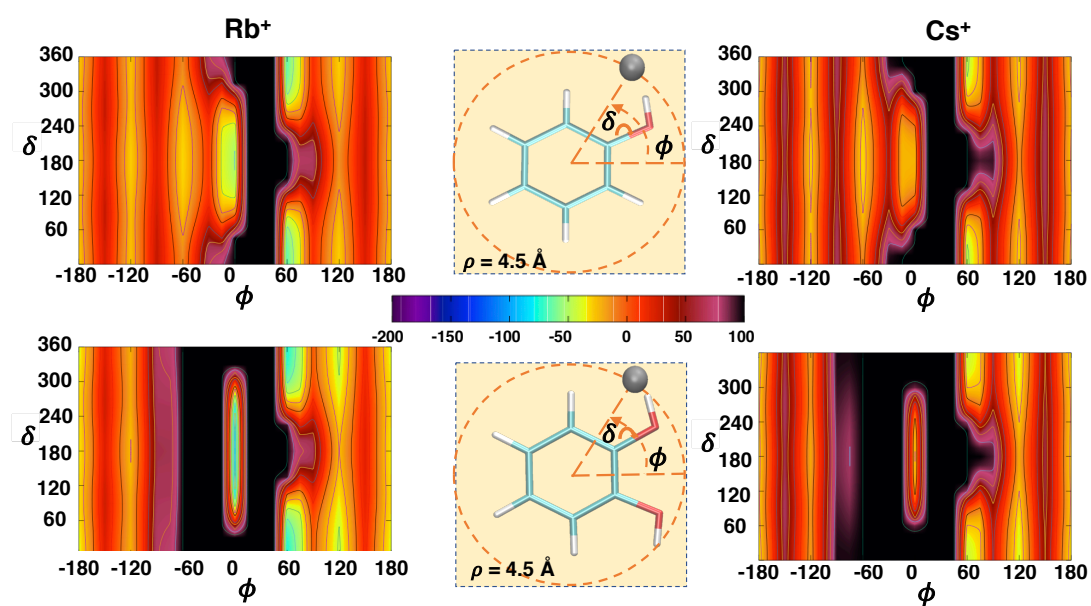

Figure S8: 2D interaction energy plots  $\Delta E(\phi, \delta)$  computed at  $MP2^{mod}$  level between phenol (top) or catechol (bottom) and  $Rb^+$  (left) or  $Cs^+$  (right) cations. The sampled PES region is shown in the insets together with the investigated dihedral. In the color palette, interaction energy is reported in kJ/mol.

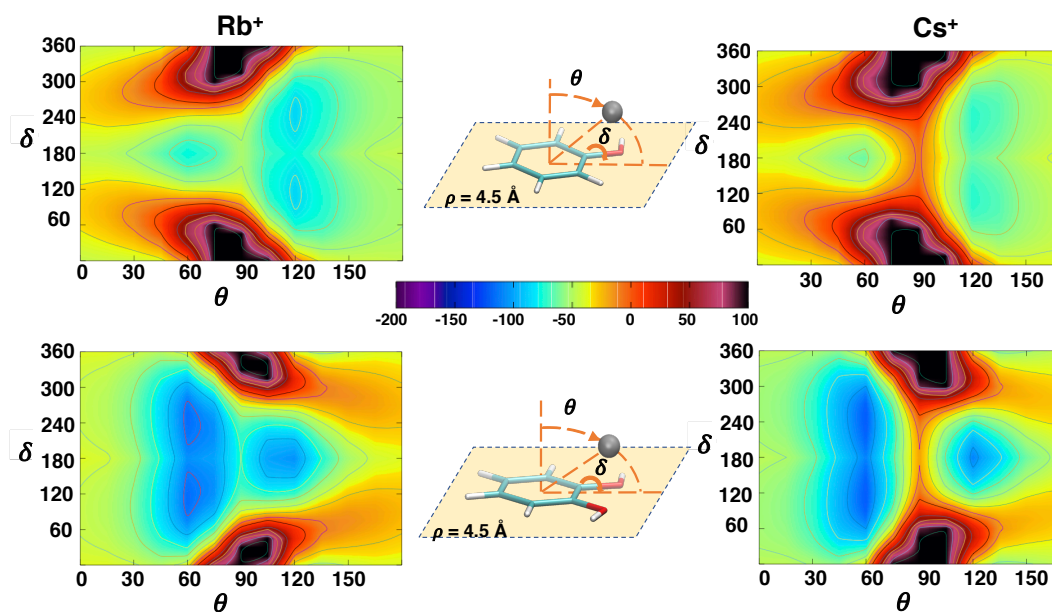

Figure S9: 2D interaction energy plots  $\Delta E(\theta, \delta)$  computed at  $\text{MP2}^{\text{mod}}$  level between phenol (top) or catechol (bottom) and  $\text{Rb}^+$  (left) or  $\text{Cs}^+$  (right) cations. The sampled PES region is shown in the insets together with the investigated dihedral. In the color palette, interaction energy is reported in kJ/mol.
